# Supplementary material for: Soil and Foliar Applications of Wood Distillate Differently Affect Soil Properties and Field Bean Traits in Preliminary Field Tests
Source: MDPI journal article supplement (doi:10.3390/plants12010121), 2022-12-26
Supplement: s1 [file s1]

Table S1. Results of ANOVA Table 1.

| Source of Variation |              | DOC (mg kg <sup>-1</sup> ) | DOC (% TOC) |
|---------------------|--------------|----------------------------|-------------|
| Foliar              | F            | 5.6411                     | 40.50       |
|                     | <i>P</i> > F | 0.0449*                    | 0.0002*     |
| Soil                | F            | 9.2271                     | 392.00      |
|                     | <i>P</i> > F | 0.0161*                    | 0.0001*     |
| Foliar × Soil       | F            | 3.8028                     | 32.00       |
|                     | <i>P</i> > F | 0.0870                     | 0.0005*     |

Table S2. Results of ANOVA Table 2.

| Source of Variation |              | MB-C (mg kg <sup>-1</sup> ) | MB-C/TOC (%) |
|---------------------|--------------|-----------------------------|--------------|
| Foliar              | F            | 13.5941                     | 7.5519       |
|                     | <i>P</i> > F | 0.0062*                     | 0.0003*      |
| Soil                | F            | 13.5188                     | 37.4899      |
|                     | <i>P</i> > F | 0.0097*                     | 0.0251*      |
| Foliar × Soil       | F            | 10.8828                     | 36.7069      |
|                     | <i>P</i> > F | 0.0109*                     | 0.0003*      |

Table S3. Results of ANOVA Table 3.

| Source of Variation |              | APase<br>(μg p-nitrophenol g <sup>-1</sup> h <sup>-1</sup> ) | β – glu<br>(μg p-nitrophenol g <sup>-1</sup> h <sup>-1</sup> ) | Deh<br>(μg TTF g <sup>-1</sup> h <sup>-1</sup> ) | Ure<br>(μg NH <sub>4</sub> <sup>+</sup> -N g <sup>-1</sup> 2h <sup>-1</sup> ) |
|---------------------|--------------|--------------------------------------------------------------|----------------------------------------------------------------|--------------------------------------------------|-------------------------------------------------------------------------------|
| Foliar              | F            | 1.8413                                                       | 0.8565                                                         | 4.1971                                           | 2.1818                                                                        |
|                     | <i>P</i> > F | 0.2118                                                       | 0.3818                                                         | 0.0747                                           | 0.1779                                                                        |
| Soil                | F            | 8.3941                                                       | 5.7901                                                         | 53.7693                                          | 24.2424                                                                       |
|                     | <i>P</i> > F | 0.0200*                                                      | 0.0428*                                                        | 0.0001*                                          | 0.0012*                                                                       |
| Foliar × Soil       | F            | 9.9475                                                       | 7.7088                                                         | 19.5545                                          | 40.9697                                                                       |
|                     | <i>P</i> > F | 0.0135*                                                      | 0.0241*                                                        | 0.0022*                                          | 0.0002*                                                                       |

Table S4. Results of ANOVA Table 4.

| Source of Variation |              | SAI3    |
|---------------------|--------------|---------|
| Foliar              | F            | 4.5557  |
|                     | <i>P</i> > F | 0.0653  |
| Soil                | F            | 8.9292  |
|                     | <i>P</i> > F | 0.0174* |
| Foliar × Soil       | F            | 5.6039  |
|                     | <i>P</i> > F | 0.0454* |

Table S5. Results of ANOVA Table 5.

| Source of Variation |              | Soil                                                      |                                       | Leaves         |                                  | Pods           |                                  |
|---------------------|--------------|-----------------------------------------------------------|---------------------------------------|----------------|----------------------------------|----------------|----------------------------------|
|                     |              | NO <sub>3</sub> <sup>-</sup> -N<br>(mg kg <sup>-1</sup> ) | Available P<br>(mg kg <sup>-1</sup> ) | N conc.<br>(%) | P conc.<br>(mg g <sup>-1</sup> ) | N conc.<br>(%) | P conc.<br>(mg g <sup>-1</sup> ) |
| Foliar              | F            | 0.0426                                                    | 4.0833                                | 1.7933         | 2.7292                           | 0.6108         | 8.2043                           |
|                     | <i>P</i> > F | 0.8417                                                    | 0.0780                                | 0.2173         | 0.1371                           | 0.4570         | 0.0210*                          |
| Soil                | F            | 360.1702                                                  | 14.0833                               | 11.7933        | 12.2229                          | 46.7656        | 10.3836                          |
|                     | <i>P</i> > F | 0.0001*                                                   | 0.0056*                               | 0.0217*        | 0.0081*                          | 0.0001*        | 0.0122*                          |
| Foliar × Soil       | F            | 12.2979                                                   | 6.7500                                | 15.1766        | 9.1232                           | 12.687         | 11.5694                          |
|                     | <i>P</i> > F | 0.0082*                                                   | 0.0317*                               | 0.0462*        | 0.01152*                         | 0.0095*        | 0.0093*                          |

Table S6. Results of ANOVA Table 6.

| Source of Variation |              | Stem Height | N° Fertile Nodes | 1st Fertile Node | Pods (n stem <sup>-1</sup> ) | Pod (mg) | Pods (g m <sup>-2</sup> ) |
|---------------------|--------------|-------------|------------------|------------------|------------------------------|----------|---------------------------|
| Foliar              | F            | 10.758      | 24.631           | 11.206           | 7.090                        | 10.480   | 30.092                    |
|                     | <i>P</i> > F | 0.0112*     | 0.011*           | 0.0101*          | 0.0287*                      | 0.0119*  | 0.0006**                  |
| Soil                | F            | 0.9570      | 3.5567           | 2.1879           | 0.0369                       | 0.3115   | 0.8214                    |
|                     | <i>P</i> > F | 0.3566      | 0.0960           | 0.1774           | 0.8524                       | 0.5920   | 0.3912                    |
| Foliar × Soil       | F            | 0.2682      | 0.2463           | 5.0970           | 0.0008                       | 0.0498   | 1.5651                    |
|                     | <i>P</i> > F | 0.6185      | 0.6330           | 0.0539           | 0.9788                       | 0.8289   | 0.2463                    |

Table S7. Results of Student test Table 7.

| Source of Variation |              | Shoot (mg plant <sup>-1</sup> ) | Root (mg plant <sup>-1</sup> ) | R/S   | Nodule (n plant <sup>-1</sup> ) | Nodule (mg plant <sup>-1</sup> ) | Nodule (n g root <sup>-1</sup> ) | Nod/Root (mg g <sup>-1</sup> ) |
|---------------------|--------------|---------------------------------|--------------------------------|-------|---------------------------------|----------------------------------|----------------------------------|--------------------------------|
| Soil                | t            | -0.25                           | 0.53                           | 0.38  | 0.05                            | 0.23                             | -0.64                            | -0.59                          |
|                     | <i>P</i> > t | 0.811                           | 0.611                          | 0.715 | 0.961                           | 0.822                            | 0.5386                           | 0.5667                         |

Table S8. Results of ANOVA Figure 1.

| Source of Variation |              | SMF     | LMF     | RMF    |
|---------------------|--------------|---------|---------|--------|
| Foliar              | F            | 1.9756  | 4.9793  | 4.2000 |
|                     | <i>P</i> > F | 0.1975  | 0.0562  | 0.0746 |
| Soil                | F            | 15.244  | 6.3472  | 1.1524 |
|                     | <i>P</i> > F | 0.0045* | 0.0358* | 0.3144 |
| Foliar × Soil       | F            | 0.0244  | 0.6269  | 1.1524 |
|                     | <i>P</i> > F | 0.8798  | 0.4513  | 0.3144 |

**Table S9.** Results of ANOVA Figure 2 and other leaflet traits cited in the text.

| Source of Variation |              | Chl     | NBI     | Leaflet<br>(mg leaflet <sup>-1</sup> ) | Leaflet<br>(n leaf <sup>-1</sup> ) | Leaflet (cm <sup>2</sup><br>leaflet <sup>-1</sup> ) | SLA<br>(mm <sup>2</sup> mg <sup>-1</sup> ) |
|---------------------|--------------|---------|---------|----------------------------------------|------------------------------------|-----------------------------------------------------|--------------------------------------------|
| Foliar              | F            | 1.6465  | 1.0469  | 0.2712                                 | 0.1030                             | 0.0156                                              | 0.5408                                     |
|                     | <i>P</i> > F | 0.2033  | 0.3095  | 0.6041                                 | 0.7492                             | 0.9010                                              | 0.4644                                     |
| Soil                | F            | 8.6525  | 9.9526  | 4.4624                                 | 0.0000                             | 0.8950                                              | 0.3750                                     |
|                     | <i>P</i> > F | 0.0043* | 0.0023* | 0.0379*                                | 1.0000                             | 0.3471                                              | 0.5421                                     |
| Foliar × Soil       | F            | 8.1412  | 5.6996  | 0.6975                                 | 2.5745                             | 0.0182                                              | 0.1121                                     |
|                     | <i>P</i> > F | 0.0056* | 0.0195* | 0.4063                                 | 0.1127                             | 0.8931                                              | 0.7387                                     |
